# Supplementary material for: A two-step strategy to clarify the roles of a solution processed PFN interfacial layer in highly efficient polymer solar cells
Source: Royal Society of Chemistry journal article supplement (doi:10.1039/c5ta05117g), 2015-01-01
Supplement: c5ta05117g1.pdf [file c5ta05117g1.pdf]

## Two-steps strategy to clarify the roles of solution processed PFN interfacial layer in efficient polymer solar cells

Qianqian Sun<sup>a</sup>, Fujun Zhang<sup>a,\*</sup>, Jian Wang<sup>a</sup>, Qiaoshi An<sup>a</sup>, Chen Zhao<sup>b</sup>, Lingliang Li<sup>a</sup>, Feng Teng<sup>a</sup>  
and Bin Hu<sup>a,c</sup>

<sup>a</sup> Key Laboratory of Luminescence and Optical Information, Ministry of Education, Beijing Jiaotong University, Beijing 100044, China

<sup>b</sup> School of Optical and Electronic Information and Wuhan National Laboratory for Optoelectronics, Huazhong University of Science and Technology, Wuhan 430074, China

<sup>c</sup> Department of Materials Science and Engineering, University of Tennessee, Knoxville, Tennessee 37996, United States

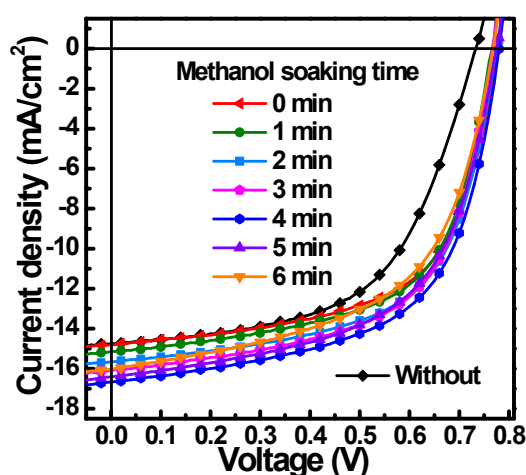

**Fig. S1** The  $J$ - $V$  characteristic curves of PSCs without or with different methanol soaking time under AM1.5G illumination at intensity of  $100 \text{ mW/cm}^2$ .

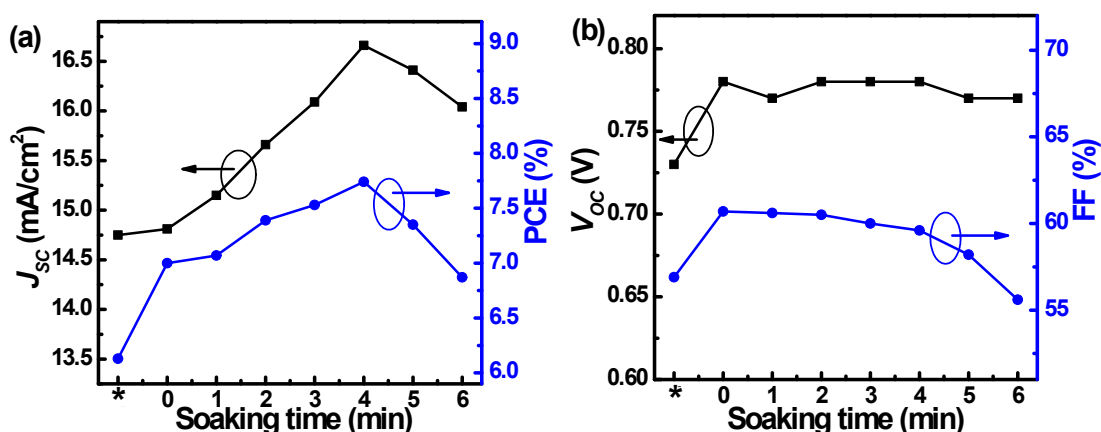

**Fig. S2** The  $V_{oc}$ , FF,  $J_{sc}$  and PCE of PSCs dependence on the methanol soaking time. (\* indicates without methanol treatment).

\* Email: [fjzhang@bjtu.edu.cn](mailto:fjzhang@bjtu.edu.cn) (Fujun), Tel: 0086-10-51684908

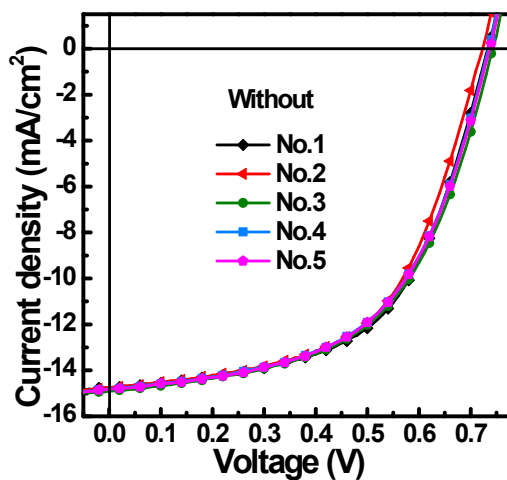

**Fig. S3** The  $J$ - $V$  curves of PSCs without methanol treatment under AM1.5G illumination at  $100 \text{ mW/cm}^2$  prepared from different batches.

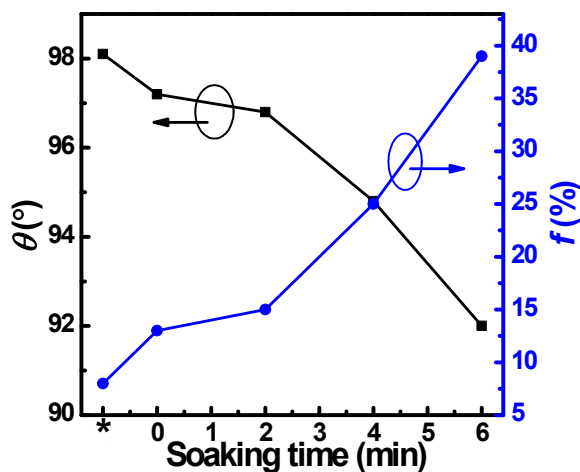

**Fig. S4** Water contact angle the  $\text{PC}_{71}\text{BM}$  surface coverage of the top surface blend film dependence on the methanol soaking time. (\* indicates without methanol treatment)

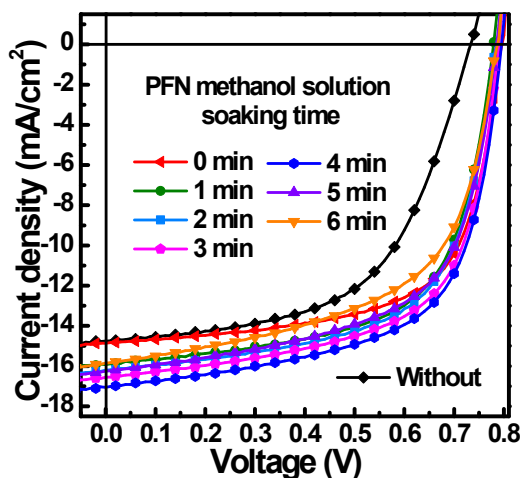

**Fig. S5** The  $J$ - $V$  curves of PSCs with different PNF methanol solution soaking time under AM1.5G illumination at  $100 \text{ mW/cm}^2$ .

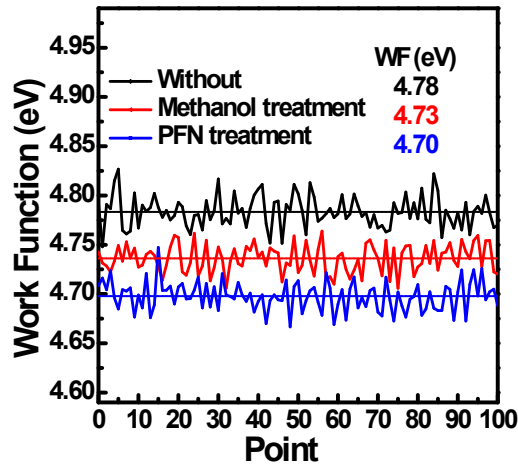

**Fig. S6** The work functions of active layers with (without) methanol or PFN methanol solution treatment.

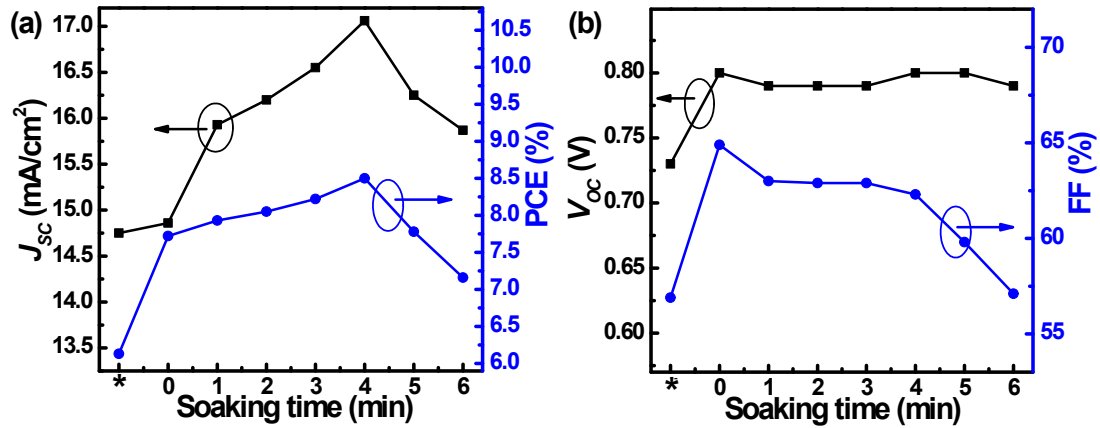

**Fig. S7** The  $V_{oc}$ , FF,  $J_{sc}$  and PCE of PSCs dependence on the PFN methanol solution soaking time. (\* indicates without methanol treatment)

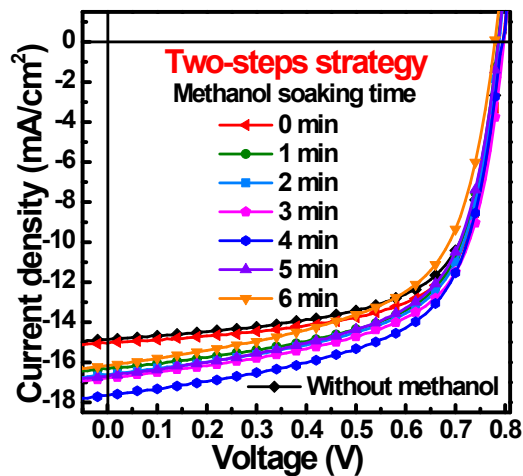

**Fig. S8** The  $J$ - $V$  curves of PSCs with the two-steps strategy or only spin-coating PFN methanol solution under AM1.5G illumination at 100 mW/cm<sup>2</sup>.

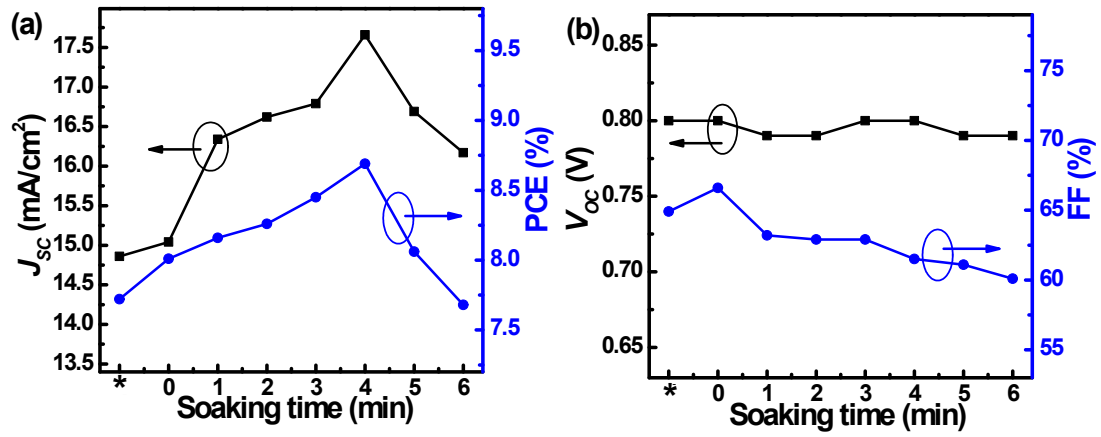

**Fig. S9** The  $V_{oc}$ , FF,  $J_{sc}$  and PCE of PSCs with the two-steps strategy dependence on the methanol solution soaking time. (\* indicates without methanol treatment and directly spin-coating PFN methanol solution on the active layer)
